# Supplementary material
Source: publisher site journal article supplement (http://kjim.org/upload/media/kjim-2022-249_suppl12.pdf)
Supplement: Supplementary file 1 [file kjim-2022-249_suppl12.pdf]

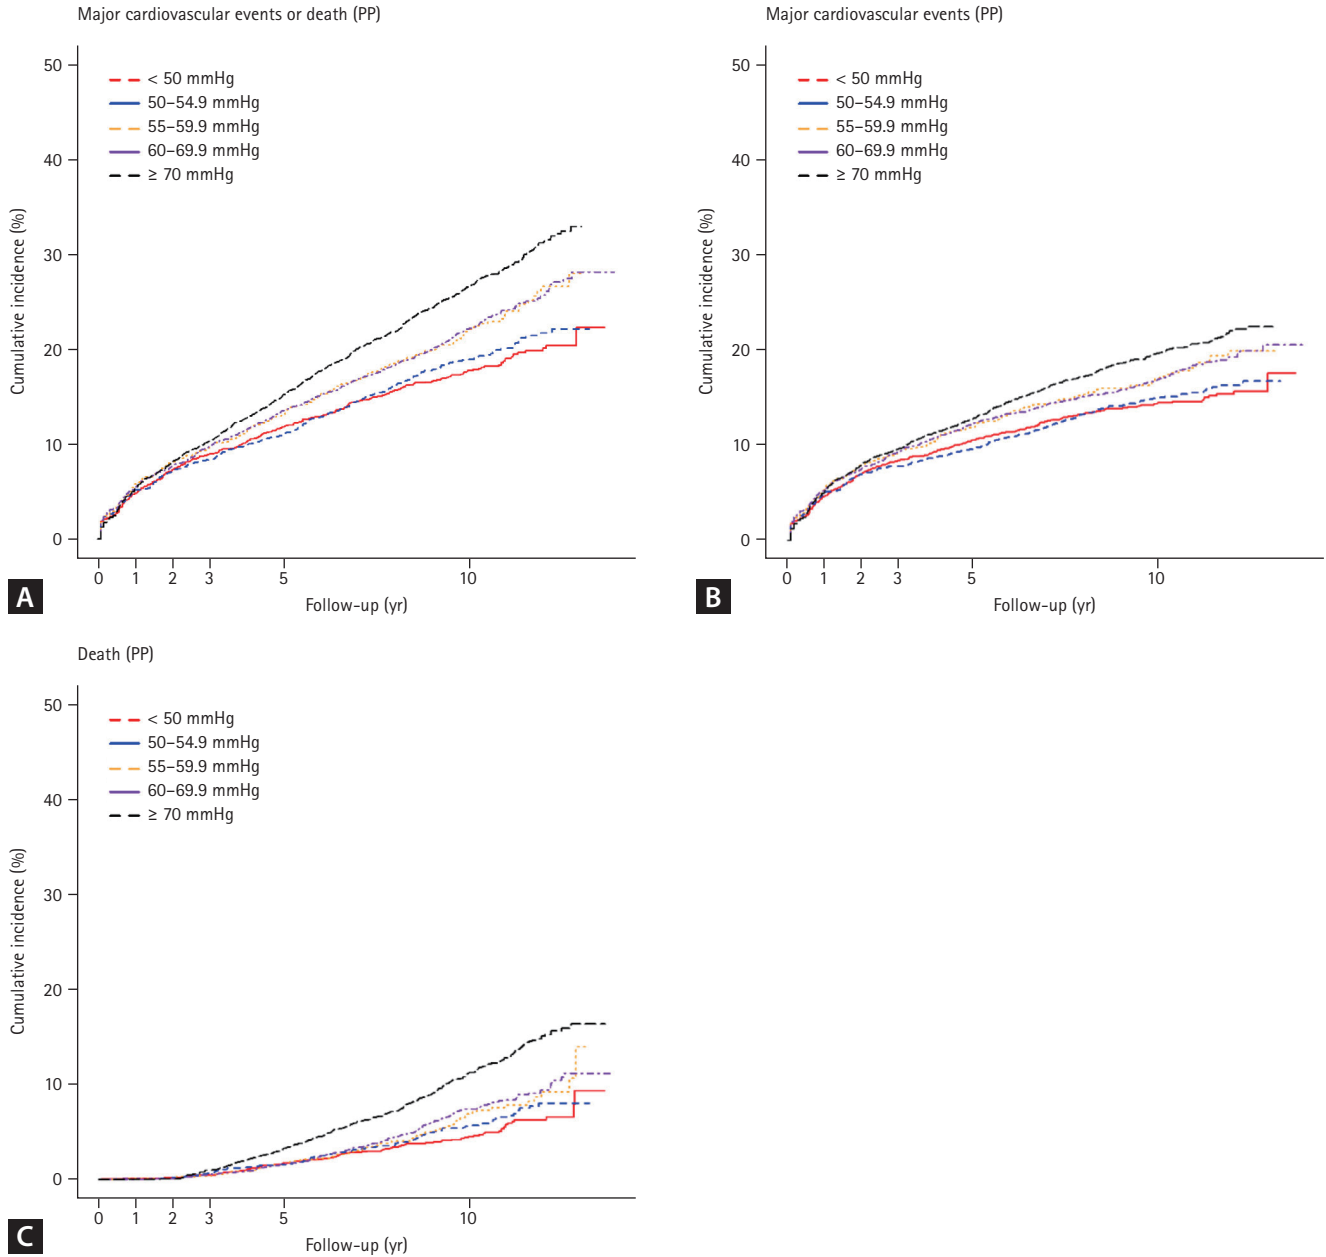

**Supplementary Figure 4.** Cumulative incidence of cardiovascular events in hypertensive group according to pulse pressure (PP) quintiles. (A) Major cardiovascular events or death. (B) Major cardiovascular events. (C) Death.
